# Supplementary material for: NLRP3 expression in mesencephalic neurons and characterization of a rare NLRP3 polymorphism associated with decreased risk of Parkinson’s disease
Source: PubMed Central journal article supplement (PMC6093937; doi:10.1038/s41531-018-0061-5), 2018-08-15
Supplement: 41531_2018_61_MOESM1_ESM.pdf [file 41531_2018_61_MOESM1_ESM.pdf]

## Supplementary Figures

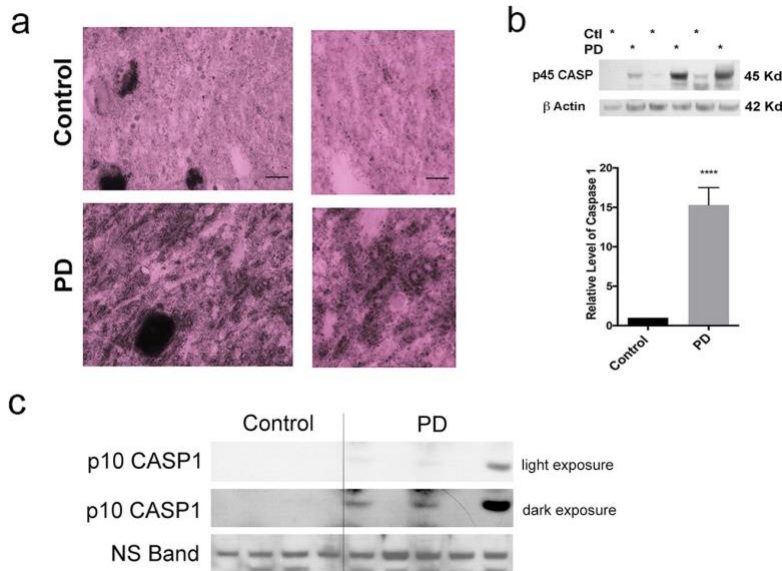

### Supplementary Figure 1: Caspase 1 expression and activation in the mesencephalon.

**A.** Immunohistologic sections obtained from the human mesencephalon of controls and PD patients were stained with anti-caspase-1 antibodies. **B.** Cleared brain homogenates were prepared from cryopreserved tissues obtained from representative control and PD patients, size fractionated and immunoblotted for caspase-1. Immunoblotting revealed an increase in the 45 kDa caspase-1 protein in PD patients as compared with controls (B, lower panel,  $n = 3$  per group,  $P < 0.001$ ). **C.** In a subset of extracts from PD patients, a 10 kDa caspase-1 immunoreactive band was observed indicative of caspase-1 cleavage and activation.  $\beta$ -actin immunoblotting was conducted to ensure accuracy of protein loading.

**a**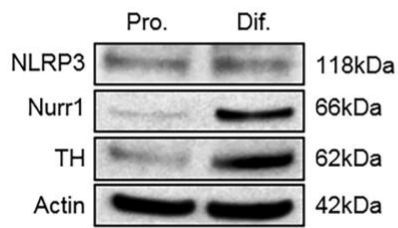**b**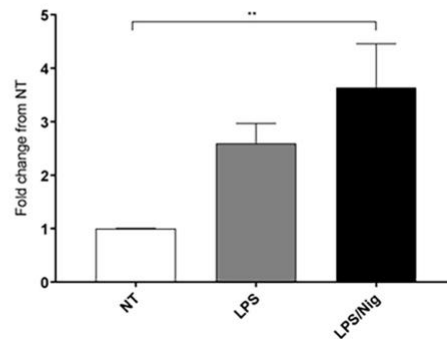

### Supplementary Figure 2: NLRP3 inflammasome expression and activity in SH-SY5Y cells.

**A.** Undifferentiated (Pro.) and differentiated (Dif.) SH-SY5Y cells were harvested and interrogated with SDS-PAGE and immunoblotting. Membranes were probed with anti-NLRP3, anti-Nurr1, anti-TH and anti-actin antibodies. **B.** Differentiated SH-SY5Y cells were treated with LPS or LPS+Nigericin and subjected to a FAM-FLICA caspase-1 assay. Caspase-1 activity was statistically elevated upon treatment (\*\*  $P < 0.01$ , one-way ANOVA,  $n = 3$  biological replicates).

### Supplementary Table

**Supplementary Table 1.** Parkinson disease risk in the Parkinson's Progression Markers Initiative (PPMI) study associated with the *NLRP3* SNP rs7525979 (additive inheritance model)

|                   | Cases<br>n=402, n (%) | Controls<br>n=182, n (%) | OR (95% CI)         | P-value |
|-------------------|-----------------------|--------------------------|---------------------|---------|
| Age, mean (sd)    | 62.2 (9.7)            | 61.6 (11.0)              | 1.005 (0.99 - 1.02) | 0.55    |
| Sex               |                       |                          |                     |         |
| Male              | 260 (64.7)            | 116 (63.7)               | 1.0 (Reference)     |         |
| Female            | 142 (35.3)            | 66 (36.3)                | 0.94 (0.65 - 1.37)  | 0.76    |
| rs7525979 (C/C)   |                       |                          |                     |         |
| C/C (0)           | 357 (88.8)            | 148 (81.3)               | 1.0 (Reference)     |         |
| C/T (1) + T/T (2) | 45 (11.2)             | 34 (18.7)                | 0.59 (0.38 - 0.93)  | 0.02    |

Model adjusted for all variables in the table
